# Supplementary material for: A liquid metal assisted dendrite-free anode for high-performance Zn-ion batteries
Source: Royal Society of Chemistry journal article supplement (doi:10.1039/d0ta11828a), 2021-01-01
Supplement: d0ta11828a1.pdf [file d0ta11828a1.pdf]

## Electronic Supplementary Information

### A Liquid Metal Assisted Dendrite-Free Anode for High-Performance Zn-Ion Batteries

Hao Jia, Ziqi Wang, Mahmut Dirican, Sheng Qiu, Cheuk-Ying Chan, Shaohai Fu\*, Bin Fei\* and Xiangwu Zhang\*

**Table S1.** Electrochemical performance of LM@Zn and other surface coated Zn electrodes in literatures

| Coating materials            | Overpotential/Current density/<br>cycling time (mV/ mA·cm <sup>-2</sup> / h) | Reference |
|------------------------------|------------------------------------------------------------------------------|-----------|
| Liquid metal                 | 18/ 1/ 500                                                                   | Our work  |
| Carbon                       | 40/ 1/ 200                                                                   | 1         |
| Ag                           | (≈20)/ 1/ 25                                                                 | 2         |
| TiO <sub>2</sub>             | 72.5/ 1/ 150                                                                 | 3         |
| Nanoporous CaCO <sub>3</sub> | 140/ 1/ 80                                                                   | 4         |
| MOF–PVDF                     | 29/ 1/ 500                                                                   | 5         |
| Water@ZnMOF-808              | 100/ 0.1/ 200                                                                | 6         |

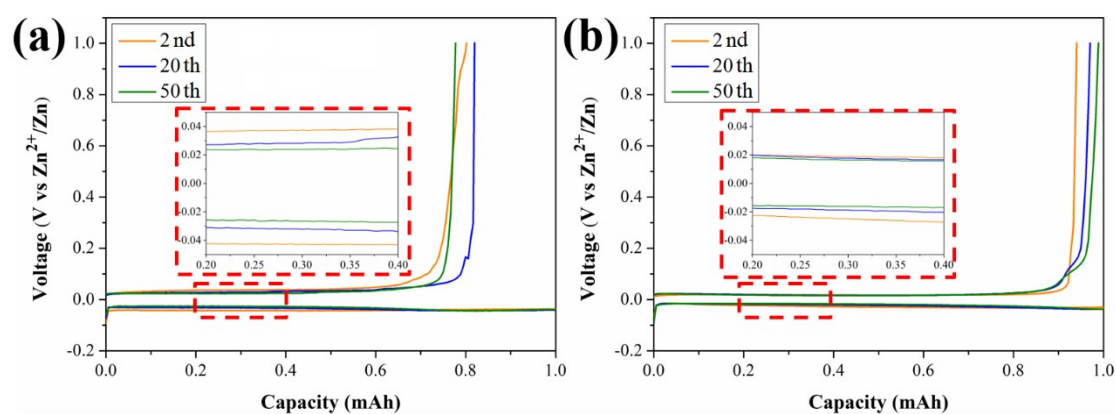

**Figure S1.** (a) The charge/discharge curves for Zn//Ti, and (b) Zn//LM@Ti cells at different cycles.

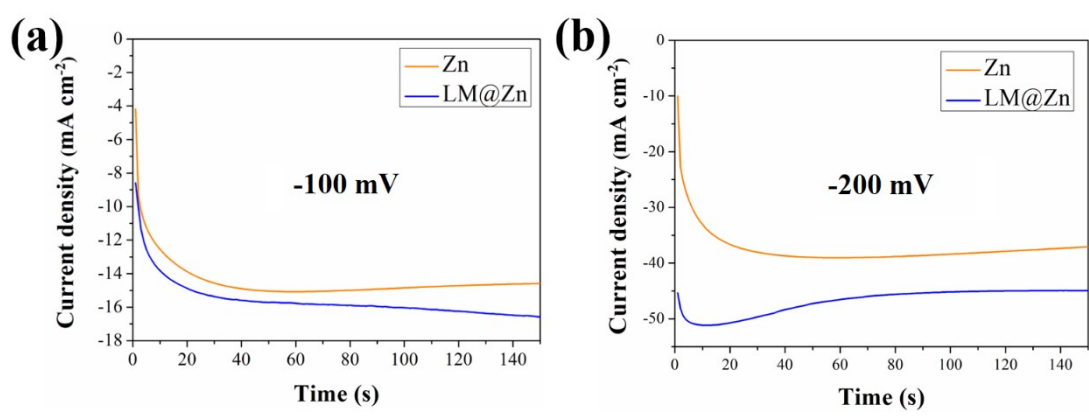

**Figure S2.** Chronoamperograms (CAs) of bare Zn and LM@Zn electrode against Zn metal reference electrode at (a) -100 mV and (b) -200 mV overpotential.

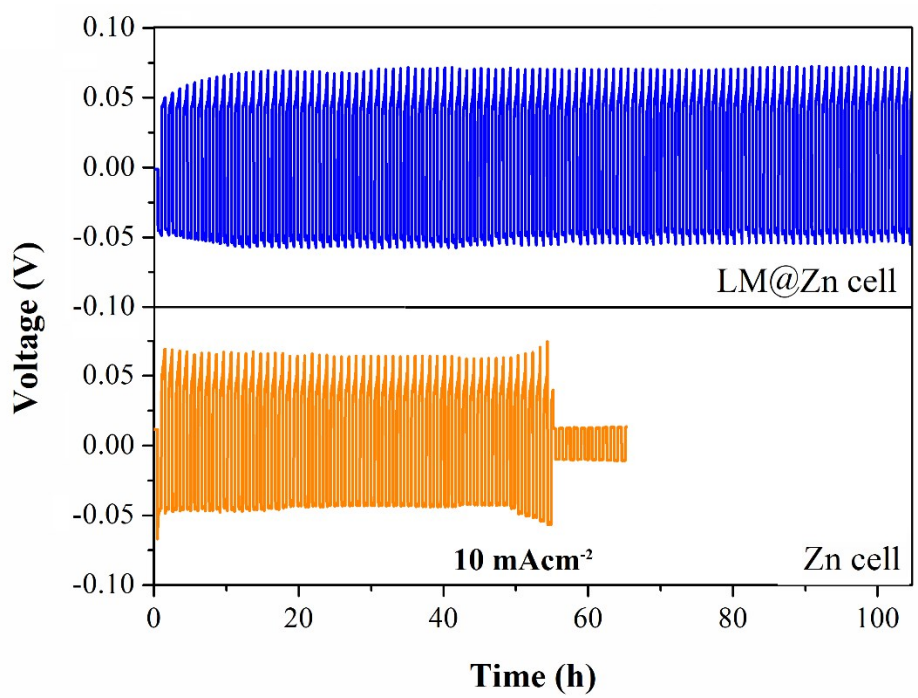

**Figure S3.** Long-term cycling performance of symmetric Zn and LM@Zn cells at a current density of 10 mA·cm<sup>-2</sup>.

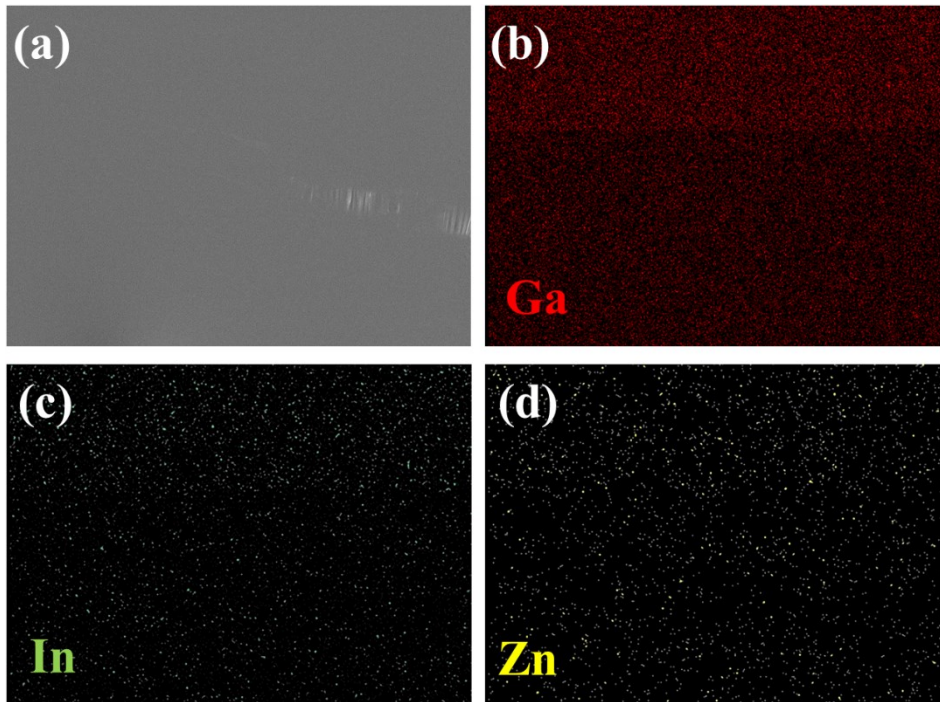

**Figure S4.** The EDX elemental maps of (a) cycled LM@Zn anode in (b) Ga, (c) In and (d) Zn.

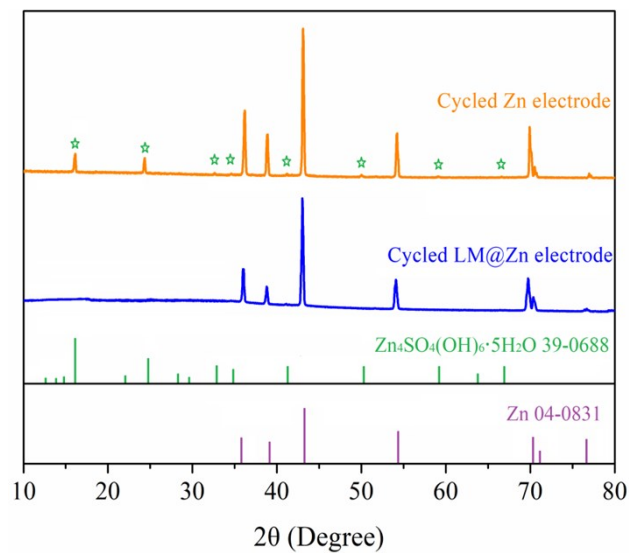

**Figure S5.** XRD patterns of Zn and LM@Zn electrodes after zinc plating/stripping cycles.

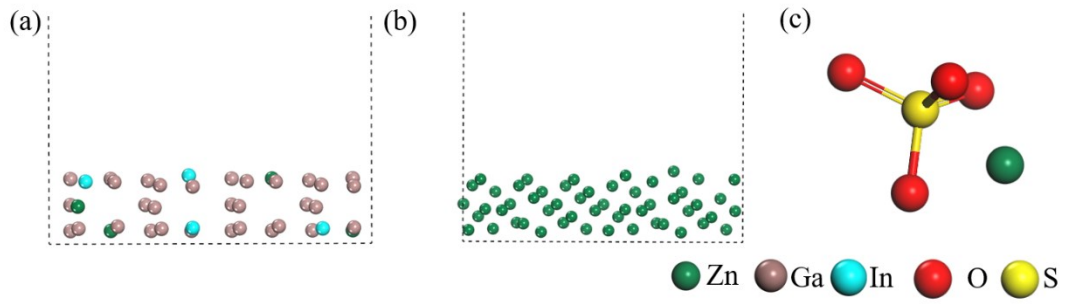

**Figure S6.** DFT model of liquid Ga-In-Zn alloy (a), Zn (b) and  $\text{ZnSO}_4$  (c).

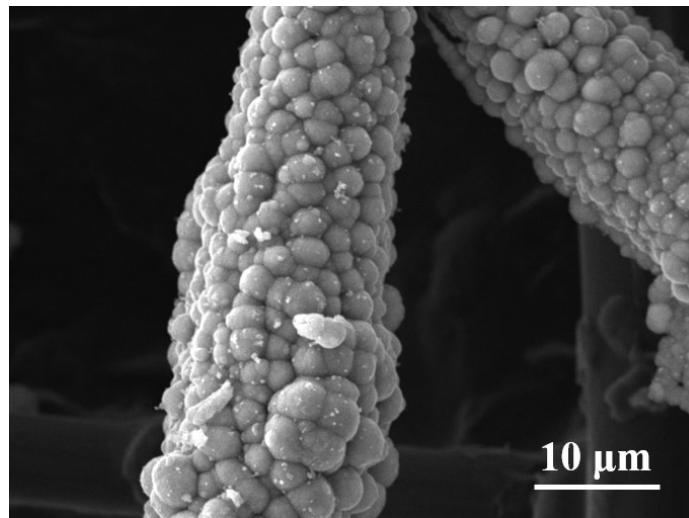

**Figure S7.** SEM image of  $\delta\text{-MnO}_2@\text{CC}$ .

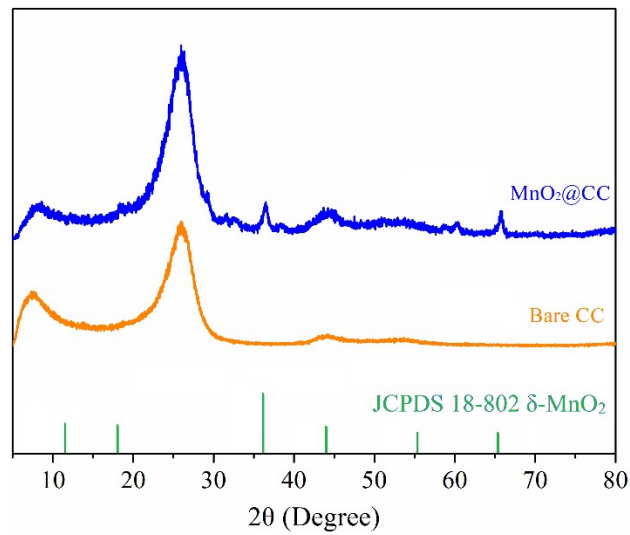

**Figure S8.** XRD patterns of  $\delta\text{-MnO}_2@\text{CC}$  and bare CC.

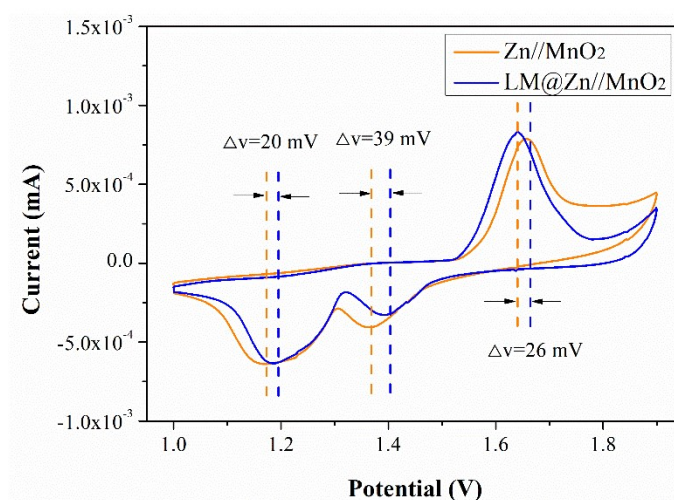

**Figure S9.** CV curves of the LM@Zn//MnO<sub>2</sub> and Zn//MnO<sub>2</sub> batteries at 0.1 mV·s<sup>-1</sup>.

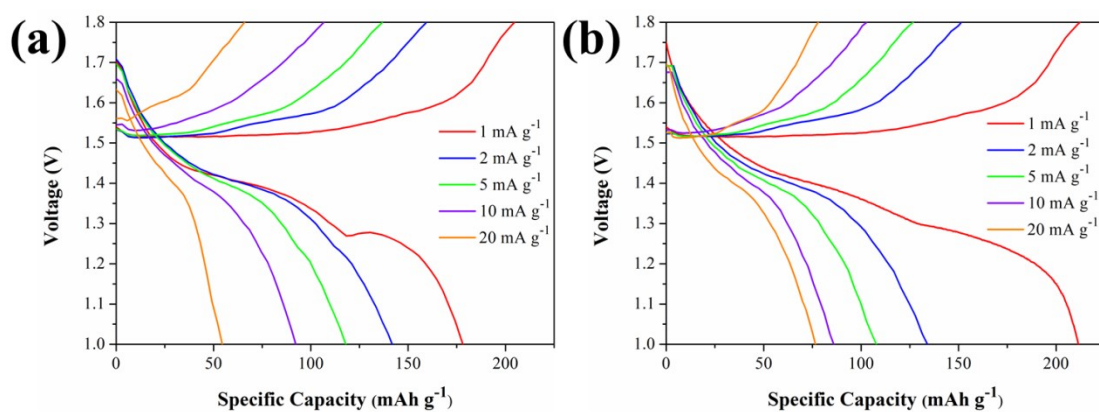

**Figure S10.** Charge/discharge profiles of the Zn//MnO<sub>2</sub> (a) and LM@Zn//MnO<sub>2</sub> batteries (b) under different rates.

The cost of liquid Ga-Sn-Zn alloy was around 0.99 USD/g, and 0.01 USD/cm<sup>2</sup> for coating application. Hence, we believe the as-prepared LM possesses the cost advantage over other previously reported surface coating materials, such as Au particles,<sup>2</sup> Mxenes,<sup>7</sup> HKUST-1,<sup>8</sup> ZIF,<sup>9</sup> and so on.

## References

- 1 W. Li, K. Wang, M. Zhou, H. Zhan, S. Cheng and K. Jiang, *ACS Appl. Mater. Interfaces*, 2018, **10**, 22059-22066.

- 2 M. Cui, Y. Xiao, L. Kang, W. Du, Y. Gao, X. Sun, Y. Zhou, X. Li, H. Li and F. Jiang, *ACS Appl. Energy Mater.*, 2019, **2**, 6490-6496.
- 3 K. Zhao, C. Wang, Y. Yu, M. Yan, Q. Wei, P. He, Y. Dong, Z. Zhang, X. Wang and L. Mai, *Adv. Mater. Interfaces*, 2018, **5**, 1800848.
- 4 L. Kang, M. Cui, F. Jiang, Y. Gao, H. Luo, J. Liu, W. Liang and C. Zhi, *Adv. Energy Mater.*, 2018, **8**, 1801090.
- 5 M. Liu, L. Yang, H. Liu, A. Amine, Q. Zhao, Y. Song, J. Yang, K. Wang and F. Pan, *ACS Appl. Mater. Interfaces*, 2019, **11**, 32046-32051.
- 6 Z. Wang, J. Hu, L. Han, Z. Wang, H. Wang, Q. Zhao, J. Liu and F. Pan, *Nano Energy*, 2019, **56**, 92-99.
- 7 N. Zhang, S. Huang, Z. Yuan, J. Zhu, Z. Zhao and Z. Niu, *Angew. Chem. Int. Ed.*, 2020, 1-6.
- 8 L. Cao, D. Li, T. Deng, Q. Li and C. Wang, *Angew. Chem. Int. Ed.*, 2020, **59**, 19292-19296.
- 9 X. Liu, F. Yang, W. Xu, Y. Zeng, J. He and X. Lu, *Adv. Sci.*, 2020, **7**, 8.
